# Supplementary material
Source: MDPI journal article supplement (https://www.mdpi.com/2073-4344/11/11/1372)
Supplement: s1 [file s1]

## Supporting Information

Article

# Palladium-Nickel Electrocatalysts on Nitrogen-Doped Reduced Graphene Oxide Nanosheets for Direct Hydrazine/Hydrogen Peroxide Fuel Cells

Mir Ghasem Hosseini <sup>1,2,\*</sup>, Vahid Daneshvari-Esfahlan <sup>1,3</sup>, Hossein Aghajani <sup>4</sup>, Sigrid Wolf <sup>3</sup> and Viktor Hacker <sup>3,\*</sup>

<sup>1</sup> Electrochemistry Research Laboratory, Department of Physical Chemistry, Faculty of Chemistry, University of Tabriz, Tabriz 51666-16471, Iran; v.daneshvari@tabrizu.ac.ir

<sup>2</sup> Department of Materials Science and Nanotechnology, Engineering Faculty, Near East University, 99318 Nicosia, North Cyprus, Mersin 10, Turkey

<sup>3</sup> Institute of Chemical Engineering and Environmental Technology, Graz University of Technology, Inffeldgasse 25/C, 8010 Graz, Austria; sigrid.wolf@tugraz.at

<sup>4</sup> Faculty of Materials & Metallurgy Engineering, Iran University of Science and Technology, Tehran 13114-16846, Iran; haghajani@iust.ac.ir

\* Correspondence: mg-hosseini@tabrizu.ac.ir (M.G.H.); viktor.hacker@tugraz.at (V.H.)

### *Synthesis of graphene oxide (GO)*

GO was prepared by the modified Hummers method, as previously described [1,2]. A natural graphite powder (5.0 g) was added to a flask containing 120 mL of sulfuric acid solution in an ice bath. 2.5 g of sodium nitrate and 15 g of potassium permanganate were added to the suspension without stirring. After the ice bath was ejected, the solution was stirred at 50 °C for 12 h. Then, 150 mL of ultrapure water was added gradually to the mixture and refluxed at 98 °C for 24 h. Afterwards, 50 mL of aqueous hydrogen peroxide solution was added to this mixture to convert the insoluble manganese species to Mn<sup>2+</sup> ions. Then, the mixture was centrifuged using hydrogen chloride to obtain the GO. The GO was rinsed with Millipore water several times, and a viscous brown dispersion is formed, filtrated, and finally dried at 65 °C under vacuum.

### *Activation of membrane electrode assembly (MEA)*

At the first, MEAs were placed in fuel cell set up. Water was flowed from each electrode for 5 h followed then by flowing NaOH 2.0 mol L<sup>-1</sup> from anode for 5 h to convert the cations in the sulfonic groups of the Nafion membrane from H<sup>+</sup> form to Na<sup>+</sup> form. Then, MEAs were activated by feeding alkaline hydrazine solution (NaOH 2.0 mol L<sup>-1</sup> + 1.0 N<sub>2</sub>H<sub>4</sub>) from anode and acidic hydrogen peroxide (H<sub>2</sub>SO<sub>4</sub> 0.5 mol L<sup>-1</sup> + H<sub>2</sub>O<sub>2</sub> 0.5 mol L<sup>-1</sup>) from cathode. The load was applied in steps of 20 mA within the range of 0-200 mA. Each step lasted for 10 min at 60 °C. After activation of MEA, the current density-potential (I-V) and current density-power density (I-P) curves were recorded using homemade electric load system.

**Table S1.** A brief summary of the purity of the used materials.

| Material                        | Formula                                                                        | Mass percent<br>purity                                            | Cas No.            | Source        | Country       |
|---------------------------------|--------------------------------------------------------------------------------|-------------------------------------------------------------------|--------------------|---------------|---------------|
| Graphite powder                 | C                                                                              | 99.99%                                                            | 7782-42-5          | Sigma Aldrich | USA           |
| Anhydrous palladium<br>chloride | PdCl <sub>2</sub>                                                              | 59.0-60.0% Pd<br>basis                                            | 7647-10-1          | Sigma Aldrich | USA           |
| Hydrous Nickel chloride         | NiCl <sub>2</sub> .6H <sub>2</sub> O                                           | ≥ 98%                                                             | 7791-20-0          | Merck         | Germany       |
| Sulfuric acid                   | H <sub>2</sub> SO <sub>4</sub>                                                 | 98.0%                                                             | 7664-93-9          | Merck         | Germany       |
| Hydrochloric acid               | HCl                                                                            | 37.0%                                                             | 7647-01-0          | Merck         | Germany       |
| Hydrus hydrazine                | N <sub>2</sub> H <sub>4</sub> . H <sub>2</sub> O                               | 98.0%                                                             | 7803-57-8          | Merck         | Germany       |
| Hydrogen peroxide               | H <sub>2</sub> O <sub>2</sub>                                                  | 30.0%                                                             | 499-83-2,7722-84-1 | Merck         | Germany       |
| Sodium borohydride              | NaBH <sub>4</sub>                                                              | 98.0%                                                             | 16940-66-2         | Alfa Aesar    | North America |
| Urea                            | CH <sub>4</sub> N <sub>2</sub> O                                               | > 99.0%                                                           | 57-13-6            | Merck         | Germany       |
| Potassium permanganate          | KMnO <sub>4</sub>                                                              | 99.0%                                                             | 7722-64-7          | Sigma Aldrich | USA           |
| Nafion solution                 | C <sub>7</sub> HF <sub>13</sub> O <sub>5</sub> S·C <sub>2</sub> F <sub>4</sub> | 5.0%                                                              | 31175-20-9         | Dupont        | USA           |
| Sodium hydroxide                | NaOH                                                                           | > 99.9%                                                           | 1310-73-2          | Fluka         | Switzerland   |
| 2-propanol                      | C <sub>3</sub> H <sub>8</sub> O                                                | ≥ 99.8%                                                           |                    | Merck         | Germany       |
| Water                           | H <sub>2</sub> O                                                               | Millipore water<br>with conductivity<br>0.055 μS.cm <sup>-1</sup> | -                  | -             | Iran          |

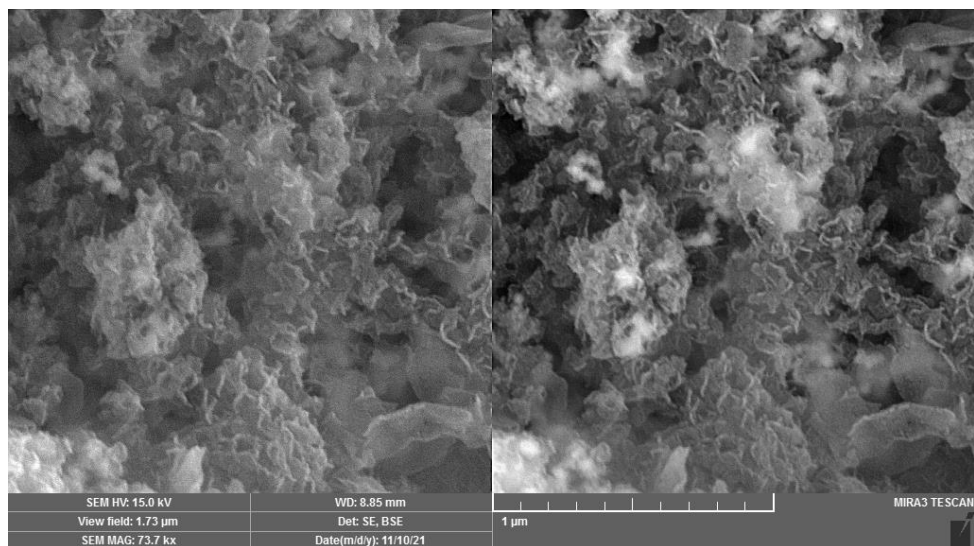

**Figure S1.** The BSE images of Pd-Ni/NrGO catalyst.

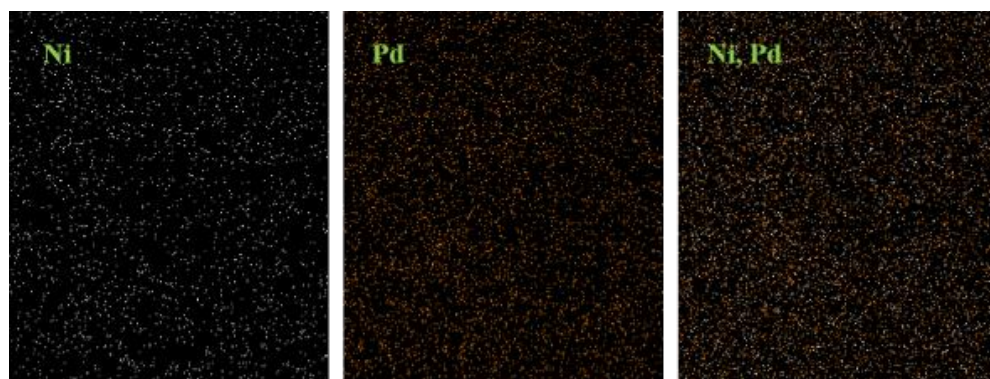

**Figure S2.** The elemental mapping images of each element in Pd-Ni/NrGO [3], Copyright 2021 American Chemical Society.

## References

- [1]. Hummers, W. S.; Offeman, R. E., Preparation of Graphitic Oxide, *J. Am. Chem. Soc.* **1958**, *80*, 1339.
- [2]. Hirata M.; Gotou, T.; Horiuchi, S.; Fujiwara, M.; Ohba, M., Thin-film particles of graphite oxide 1: High-yield synthesis and flexibility of the particles, *Carbon*, **2004**, *42*, 2929.
- [3]. Hosseini, M. G; Daneshvari-Esfahlan, V.; Wolf S.; Hacker, V., Novel Bimetallic Pd-X (X = Ni, Co) Nanoparticles Assembled on N-Doped Reduced Graphene Oxide as an Anode Catalyst for Highly Efficient Direct Sodium Borohydride–Hydrogen Peroxide Fuel Cells, *ACS App. Energy Mater.*, **2021**, *4*, 6025-6039.
